# Supplementary material
Source: PubMed Central journal article supplement (PMC5248996)
Supplement: DB160876SupplementaryData.pdf [file DB160876SupplementaryData.pdf]

SUPPLEMENTARY DATA

**Hepatic Expression of Adenovirus 36 E4ORF1 Improves Glycemic Control and Promotes Glucose Metabolism via Akt Activation**

Travis B. McMurphy<sup>1,2\*</sup>, Wei Huang<sup>1,2\*</sup>, Run Xiao<sup>1,2</sup>, Xianglan Liu<sup>1,2</sup>, Nikhil V. Dhurandhar<sup>3</sup>, and Lei Cao<sup>1,2</sup>

SUPPLEMENTARY DATA

**Supplementary Figure S1. Pilot study of intravenous injection of rAAV to wild type mice.** (A) GFP fluorescence in the liver of mice receiving rAAV-GFP. Scale bar: 100  $\mu$ m. (B) Western blots of Ad36E4ORF1 in various tissues of a mouse receiving rAAV-Ad36E4ORF1.

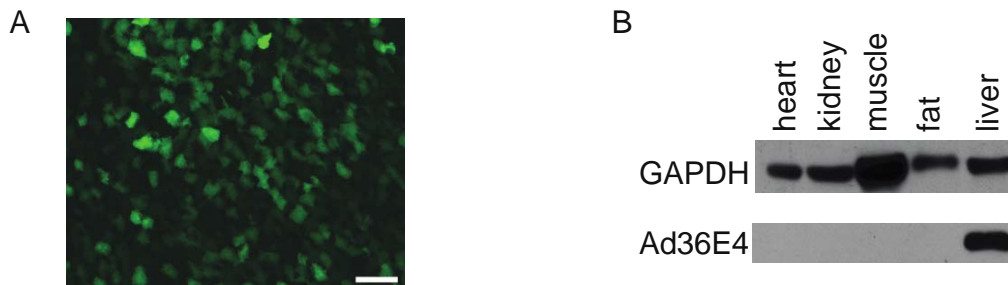

SUPPLEMENTARY DATA

**Supplementary Figure S2. Ad36E4ORF1 gene transfer in *db/db*.** (A) Glucose tolerance test. (B, C) Insulin tolerance test. n=8 per group. Data are means  $\pm$  SEM. \*  $P < 0.05$ , \*\*  $P < 0.01$ , \*\*\*  $P < 0.001$ .

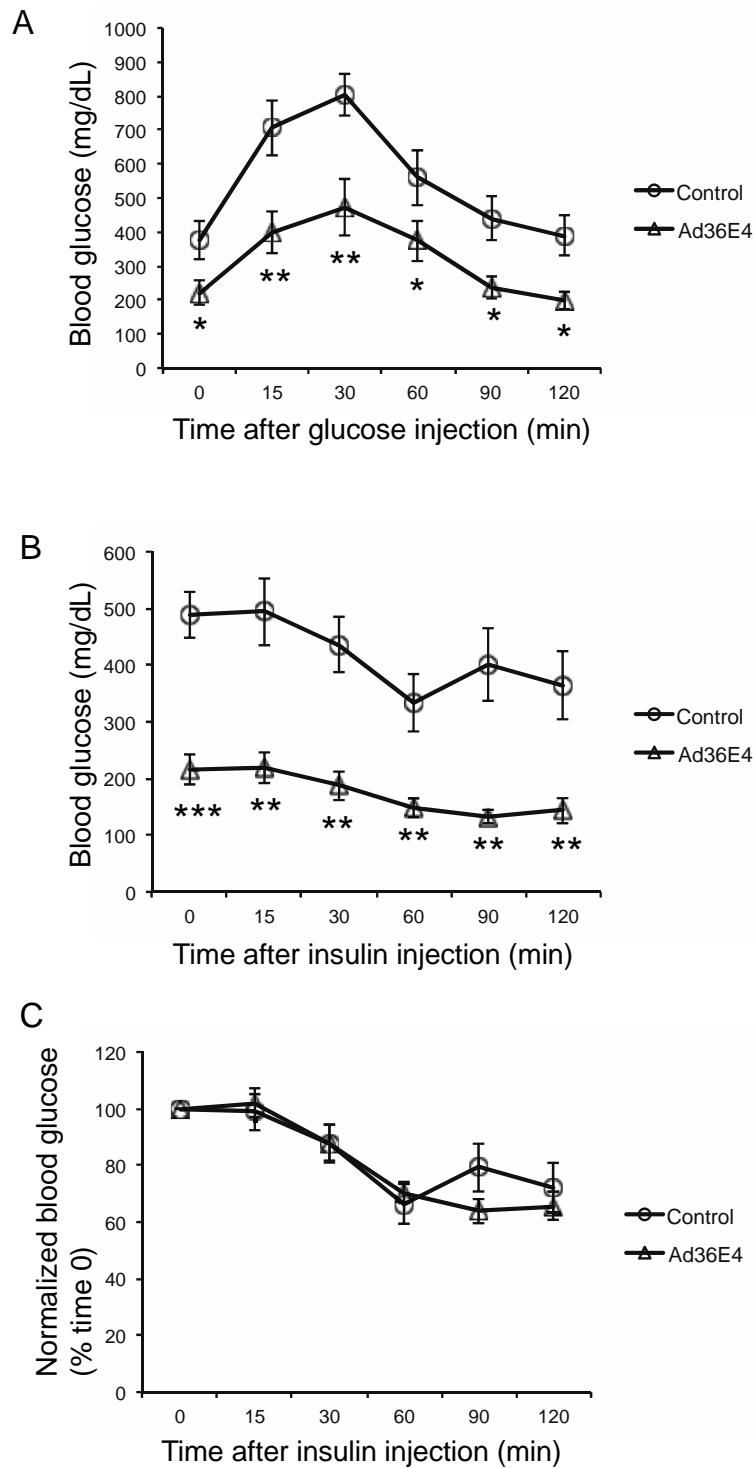

SUPPLEMENTARY DATA

**Supplementary Figure S3. Gene expression of hypothalamus in Ad36E4ORF1 and Ad5E4ORF1 treated *db/db* mice.** n=4 per group. \*  $P < 0.05$  compared to YFP control. Npy, neuropeptide Y; Pomc, proopiomelanocortin; Cartpt, cocaine-amphetamine-regulated transcript; Crh, corticotropin-releasing hormone; Trh, thyrotropin-releasing hormone; Insr, insulin receptor; Mc4r, melanocortin-4 receptor

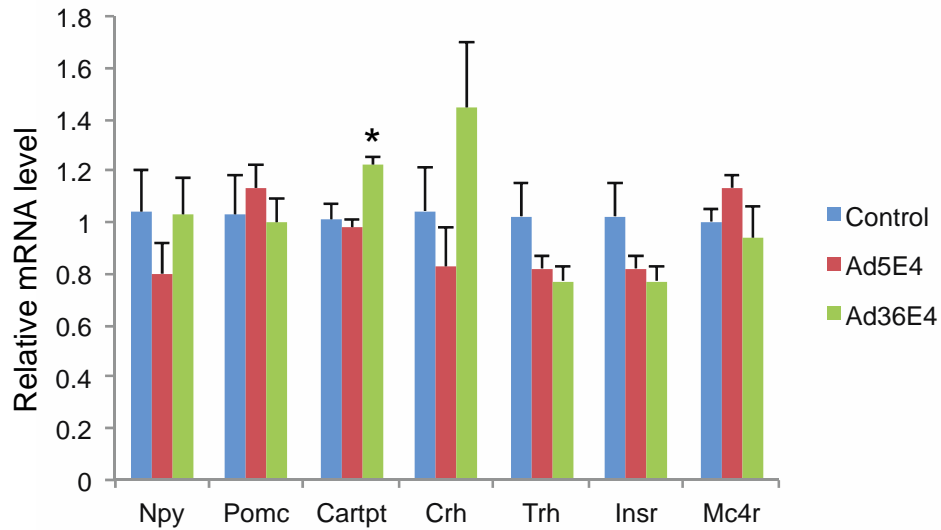

SUPPLEMENTARY DATA

**Supplementary Figure S4. Inflammatory gene expression of liver in Ad36E4ORF1 and Ad5E4ORF1 treated *db/db*, DIO, and normal wild type mice.** (A) *db/db* mice. n=8 Control, n=5 Ad5E4ORF1, n=5 Ad36E4ORF1. (B) DIO mice. n=5 per group. (C) Normal wild type mice. n=5 per group. Low:  $2 \times 10^9$ , high:  $2 \times 10^{10}$  vg per mouse. Data are means  $\pm$  SEM. \*  $P < 0.05$ , \*\*  $P < 0.01$ , \*\*\*  $P < 0.001$  compared to YFP control.

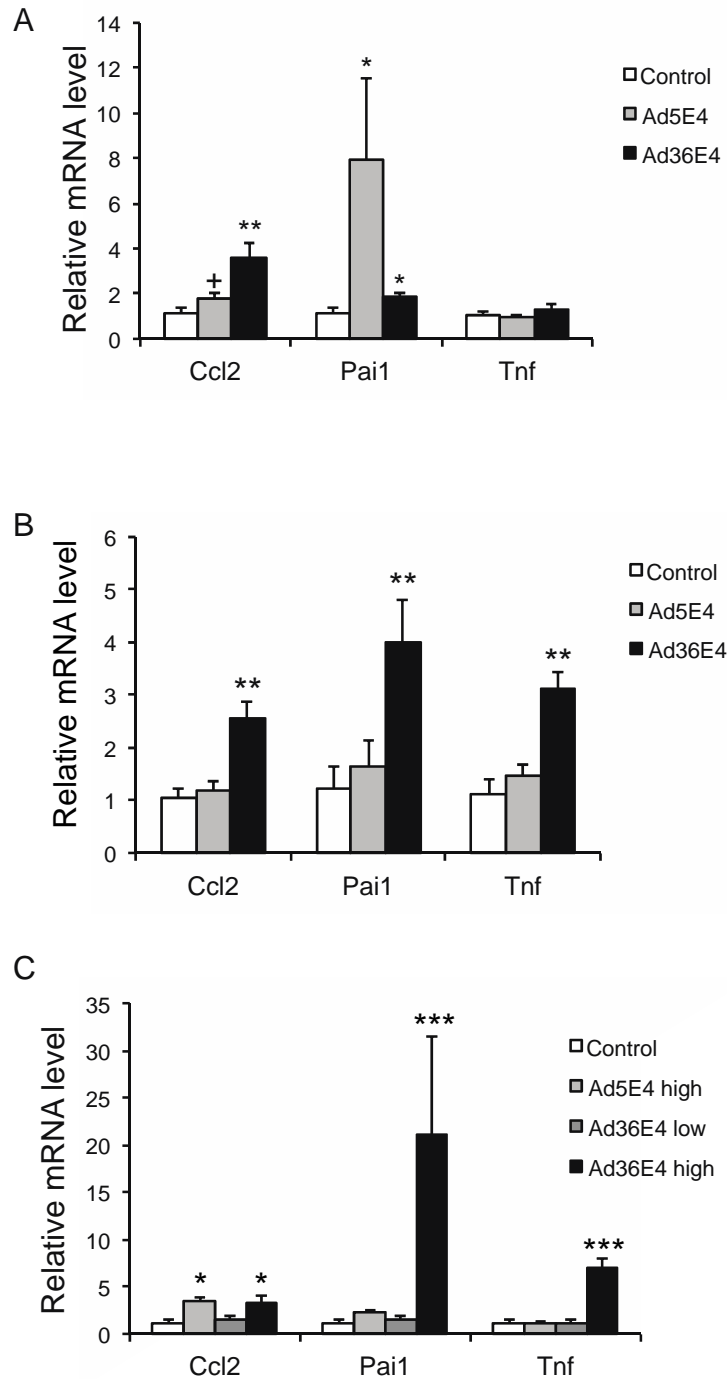

SUPPLEMENTARY DATA

**Supplementary Figure S5. Gene expression of abdominal fat depot in Ad36E4ORF1 and Ad5E4ORF1 treated wild type mice.** n=5 per group. Data are means  $\pm$  SEM. high:  $2 \times 10^{10}$  vg per mouse. Glut4, glucose transporter type 4; Insr, insulin receptor; Lep, leptin; Cpt1a, carnitine palmitoyltransferase 1A; Lpl, lipoprotein lipase; Saa3, serum amyloid A3; Srebf1c, sterol regulatory element-binding protein.

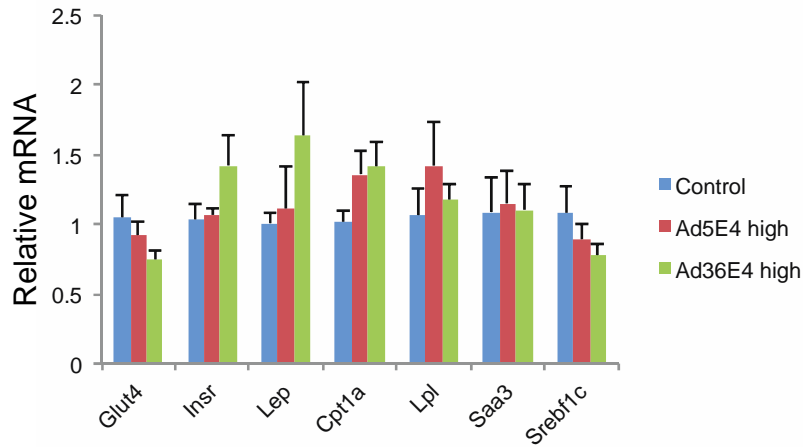

SUPPLEMENTARY DATA

**Supplementary Table S1. Liver function panel of *db/db* mice**

|                | <b>ALB</b><br>(g/dL) | <b>ALP</b><br>(U/L) | <b>ALT</b><br>(U/L) | <b>AST</b><br>(U/L) | <b>DBILI</b><br>(mg/dL) | <b>GGT</b><br>(U/L) | <b>GLOB</b><br>(U/L) | <b>TBILI</b><br>(mg/dL) | <b>TPROT</b><br>(g/dL) |
|----------------|----------------------|---------------------|---------------------|---------------------|-------------------------|---------------------|----------------------|-------------------------|------------------------|
| <b>Control</b> | 3.45±0.09            | 193.86±10.26        | 205.88±41.20        | 230.25±23.66        | 0.26±0.04               | 3.13±0.44           | 2.09±0.06            | 0.29±0.04               | 5.54±0.11              |
| <b>Ad5E4</b>   | 3.35±0.10            | 238.38±13.03*       | 244.75±49.44        | 383.75±87.35        | 0.24±0.02               | 4.5±0.65            | 2.25±0.06            | 0.24±0.02               | 5.6±0.10               |
| <b>Ad36E4</b>  | 3.56±0.06            | 326.88±13.20*       | 289.50±23.51        | 295.25±22.12        | 0.28±0.05               | 3.75±0.53           | 2.48±0.08*           | 0.31±0.04               | 6.04±0.13*             |

Data are means ± SEM. n=8 per groups, \*  $P<0.05$  compared to Control.

SUPPLEMENTARY DATA

**Supplementary Table S2. Quantification of western blot of *db/db* mice**

|                | pAKT S473   | pAKT T308  | Ras        | ric1      | Myc       | pFoxo1    | pIR       | pIRS2     | Chrebp    | Srebp1    |
|----------------|-------------|------------|------------|-----------|-----------|-----------|-----------|-----------|-----------|-----------|
| <b>Control</b> | 1±0.08      | 1±0.26     | 1±0.04     | 1±0.21    | 1±0.01    | 1±0.11    | 1±0.19    | 1±0.10    | 1±0.13    | 1±0.32    |
| <b>Ad5E4</b>   | 0.74±0.08   | 0.97±0.60  | 1.34±0.09* | 0.77±0.05 | 0.99±0.09 | 0.68±0.09 | 0.92±0.13 | 1.24±0.62 | 0.53±0.04 | 0.33±0.10 |
| <b>Ad36E4</b>  | 1.51±0.05** | 3.38±0.81* | 1.16±0.14  | 0.71±0.20 | 0.95±0.03 | 0.66±0.17 | 0.69±0.08 | 0.80±0.08 | 0.60±0.04 | 0.35±0.12 |

Data are means ± SEM. n=3 per groups, \*  $P<0.05$ , \*\*  $P<0.01$  compared to Control. Phospho-proteins are calibrated to the respective total protein.



SUPPLEMENTARY DATA

**Supplementary Table S3. Quantification of western blot of DIO mice**

|                | pAKT S473  | pAKT T308  | Ras       | ricor      | pFoxo1    | pIR       | Chrebp    | Srebp1     |
|----------------|------------|------------|-----------|------------|-----------|-----------|-----------|------------|
| <b>Control</b> | 1±0.38     | 1±0.30     | 1±0.28    | 1±0.13     | 1±0.09    | 1±0.30    | 1±0.19    | 1±0.11     |
| <b>Ad5E4</b>   | 0.42±0.23  | 0.40±0.19  | 1.17±0.23 | 0.74±0.19  | 1.16±0.12 | 1.38±0.12 | 0.89±0.11 | 0.58±0.07* |
| <b>Ad36E4</b>  | 1.59±0.13* | 2.88±0.45* | 0.64±0.06 | 0.54±0.06* | 0.75±0.14 | 1.05±0.21 | 0.52±0.03 | 0.70±0.11  |

Data are means ± SEM. n=3 per groups, \*  $P<0.05$ , \*\*  $P<0.01$  compared to Control. Phospho-proteins are calibrated to the respective total protein. Quantification by Image J or Image Studio. Some blots had high background and were unable to be processed by the software.

SUPPLEMENTARY DATA

**Supplementary Table S4. Quantification of western blot of normal WT mice**

|                | pAKT S473    | pAKT T308  | Ras       | riCTOR     | pFoxo1     | Chrebp     | Srebp1     |
|----------------|--------------|------------|-----------|------------|------------|------------|------------|
| <b>Control</b> | 1±0.12       | 1±0.33     | 1±0.10    | 1±0.15     | 1±0.15     | 1±0.14     | 1±0.10     |
| <b>Ad5E4</b>   | 1.99±0.75    | 3.05±0.92  | 0.74±0.10 | 1.54±0.06* | 1.27±0.11* | 1.06±0.21  | 1.21±0.34  |
| <b>Ad36E4</b>  | 2.48±0.14*** | 5.72±1.15* | 0.85±0.16 | 1.11±0.08  | 2.28±0.26* | 1.49±0.09* | 1.47±0.08* |

Data are means ± SEM. n=3-5 per groups, \*  $P<0.05$ , \*\*\*  $P<0.001$  compared to Control. Phospho-proteins are calibrated to the respective total protein. Quantification by Image J or Image Studio.
